# Supplementary material
Source: publisher figshare collection journal article supplement (https://tandf.figshare.com/ndownloader/files/30770819)
Supplement: Supplementary file 1 [file 30770819]

Archive with 3 entries (3 files):
- Johnson_SuppA.docx
- Johnson_SuppB.pdf
- Johnson_SuppC.docx
