# Supplementary material
Source: publisher figshare collection journal article supplement (https://tandf.figshare.com/ndownloader/files/30770819)
Supplement: Supplementary file 1 [file 30770819 › Johnson_SuppA.docx]

Supplementary Materials A. Table of the number of students from each major that participated in the AR sandbox spatial study.

| **Major** | | **Count** |
| --- | --- | --- |
| Nono-STEM | Graphic Design | 1 |
|  | Business | 6 |
|  | Education | 2 |
|  | Liberal Arts | 9 |
|  | Agriculture and Forestry | 1 |
| STEM | Science and Math | 10 |
|  | Engineering | 4 |
|  | Health and Medicine | 5 |
|  | Undeclared (*excluded*) | 1 |
