# Supplementary material
Source: publisher figshare collection journal article supplement (https://tandf.figshare.com/ndownloader/files/30770819)
Supplement: Supplementary file 1 [file 30770819 › Johnson_SuppC.docx]

Supplementary Materials C: AR Sandbox Spatial Topography Activity Rubric

| Activity (Targeted Skill) | Learning Goal | Tasks | Successful (1 point) | Unsuccessful (0 points) | Notes |
| --- | --- | --- | --- | --- | --- |
| Elevation (MR) | Use colors and numbers to represent elevation. | Explain how the colors represent elevation. | Colors are listed from highest to lowest elevation: white, red, orange, yellow, green, blue. | Colors are listed in the incorrect order. |  |
| Mark the areas on the map with the highest and lowest elevation. | The area on the left side of the map with an elevation of "400 " is marked as lowest, and the area on the right side of the map marked with an elevation of "1000" is marked as the highest. | The areas are incorrectly marked on the map. |  |
| Determine the transformation that has occurred. | "Rotation" was selected. | "Flip", "Translation", or no answer was selected. |  |
| Draw an accurate compass for the transformed map. | The compass has South on the top, West on the right, North on the bottom, and East on the left. | The compass is incorrectly labeled. |  |
| Topographic Profiles (SV) | Interpret steepness of slope. | Select the steeper side of the ridge. | The eastern side of the ridge is marked as steeper. | The western side of the ridge is marked as steeper. |  |
| Determine how line spacing can be related to slope steepness. | The response says that steeper slopes have lines closer together or shallow slopes have lines further apart. | The response incorrectly describes the lines of steep and/or shallow slopes. |  |
| Relate spatial representations of landscapes in 2D and 3D. | Sketch a topographic map and the corresponding profile from A to B. | The profile accurately depicts the topography of the map sketch. | The profile does not represent the map sketch. |  |
| Draw a compass on the map and write the direction the cross section is in. | There is a correct compass drawn and the direction of the cross-section is correctly labeled. | There is no compass, the compass is incorrectly drawn, or the direction of the cross-section is not correctly labeled. |  |
| Common Landforms (SV) | Identify the main characteristics of a watershed on a topographic map. | Describe the contour lines of the river channel. | The contour lines are described as V-shaped, U-shaped, arrowheads, or some shape resembling a "V". | The contour lines are described using some other shape, or the contour lines are not described in the description. |  |
| Determine the direction of stream flow on the provided maps. | The map on the left shows the stream flowing South and the map on the right shows the stream flowing North. | The direction of stream flow is not in the correct direction given the contour lines. |  |
| Positioning Yourself in the Landscape (SOR) | Use cardinal and relative directions to give and receive instructions. | Select the landscape feature that would impede the dinosaur's journey to the body of water in the western part of the map. | "A ridge" is selected. | "A deep lake", "A glacier", or no answer was selected. |  |
| Using the compass, determine which direction the river marked with a star is flowing. | The response says the river is flowing towards the north or northeast or flowing from the south or southwest. | The response says the river is flowing from or to an incorrect direction |  |

MR = Mental rotation, SOR = Spatial orientation, SV= Spatial visualization.
